1 **BIOLOGICAL, MOLECULAR AND PHYSIOLOGICAL CHARACTERIZATION**  
2 **OF FOUR *Soybean mosaic virus* ISOLATES PRESENT IN ARGENTINE SOYBEAN**  
3 **CROPS.**

4 Maugeri Suarez M<sup>1</sup>, Rodríguez M<sup>2-3</sup>, Bejerman, N<sup>1-4</sup>; Laguna, I. G<sup>4</sup>, Rodríguez Pardina P<sup>1-4\*</sup>

5

6 1- Instituto de Patología Vegetal IPAVE CIAP INTA Av. 11 de Septiembre 4755,  
7 X5020ICA, Córdoba, Argentina.

8 2- Instituto de Fisiología y Recursos Genéticos Vegetales, Centro de Investigaciones  
9 Agropecuarias-INTA, Av. 11 de Septiembre 4755, X5020ICA, Córdoba, Argentina.

10 3- Unidad de Estudios Agropecuarios (UDEA- CONICET)

11 4- Unidad de Fitopatología y Modelización Agrícola (UFyMA-CONICET)

12 \*Corresponding author [rodriguez.patricia@inta.gob.ar](mailto:rodriguez.patricia@inta.gob.ar)

13

14 Marianela Rodriguez ORCID: [orcid.org/0000-0003-4869-004X](https://orcid.org/0000-0003-4869-004X)

15 Patricia Rodriguez Pardina ORCID: [orcid.org/0000-0002-2601-2814](https://orcid.org/0000-0002-2601-2814)

16 Nicolas Bejerman ORCID: [orcid.org/0000-0002-7851-5306](https://orcid.org/0000-0002-7851-5306)

17

18 **Acknowledgements**

19 This work was supported by grants from the Agencia de Promoción Científica y  
20 Tecnológica, Argentina (PICT-2014-551), and Instituto Nacional de Tecnología  
21 Agropecuaria (INTA-). MR and NB are researchers of CONICET (Consejo Nacional de  
22 Investigaciones Científicas y Técnicas, Argentina). MR, NB and PRP are researchers of  
23 INTA.

24

25

## ABSTRACT

26 *Soybean mosaic virus* (SMV) causes systemic infections in soybean plants, leading to  
27 chlorotic mosaic and producing significant yield losses. The virus is widely distributed in  
28 all soybean production areas in the world. In Argentina, three geographical isolates were  
29 identified: Marcos Juárez (MJ), Manfredi (M), and North Western Argentina (NOA), and  
30 another isolate named “Planta Vinosa” (PV), which causes severe necrosis symptoms in  
31 some cultivars. Here, the biological, molecular and physiological characterization of these  
32 isolates was performed for the first time. Three of the four isolates showed a low genetic  
33 divergence in the evaluated genes (P1, CI and CP). Although SMV-NOA and SMV-PV had  
34 high homology at the sequence level, they showed wide differences in pathogenicity, seed  
35 mottling and the ability of transmission by seeds or aphids, as well as in physiological  
36 effects. SMV-NOA caused early alterations (before symptom appearance, BS) in  $\Phi$ PSII and  
37 MDA content in leaves with respect to the other isolates. After the appearance of  
38 macroscopic symptoms (late symptoms, LS), SMV-M caused a significant increase in the  
39 content of MDA, total soluble sugars, and starch with respect to the other isolates. Thus,  
40 early alterations of  $\Phi$ PSII and soluble sugars might have an impact on late viral symptoms.  
41 Likewise, SMV-MJ developed more severe symptoms in the susceptible Davis cultivar  
42 than in DM 4800. Therefore, our results show differences in genome, biological properties  
43 and physiological effects among SMV isolates as well as different interactions of SMV-MJ  
44 with two soybean cultivars.

45 Key words: *Glycine max*, physiological alterations, Potyvirus, *Soybean Mosaic Virus*, viral  
46 genome

47

48

## INTRODUCTION

49 Soybean [*Glycine max* (L) Merr.] is one of the most important legume crops and a  
50 source of edible oil and proteins. Argentina is the third world soybean producer, with 84%  
51 of the production being exported as grain, flour, oil or biodiesel (FAOSTAT 2019).  
52 Extensive and intensive production of soybean with little genetic diversity is particularly  
53 vulnerable to attack by pathogens that can reduce yield and seed quality, and even devastate  
54 big cultivation areas. Virus diseases of soybean have become increasingly prevalent,  
55 affecting this crop worldwide. *Soybean mosaic virus* (SMV) is recognized as the most  
56 serious, long-standing problem in many soybean-producing areas in the world (Wang,  
57 2009; Cui et al., 2011). Infection by SMV usually causes yield losses ranging between 35  
58 and 50%, with estimates of 50–100% in severe outbreaks (Arif & Hassan, 2002; Liao et al.,  
59 2002).

60 SMV produces variable symptoms, from small and sometimes almost unnoticeable  
61 chlorotic spots, to large chlorotic areas. Other possible symptoms include mosaic, vein  
62 clearing, blistering, leaflet deformation and internode shortening. When plants are infected  
63 with severe virus strains, the virus can induce necrotic areas in petioles, stems and leaves  
64 (Hajimorad et al., 2018). SMV also induces several types of seed mottling, with the most  
65 common one being “hilum bleeding”, caused by the spread of the hilum color towards the  
66 seed coat. SMV-infected seeds can result in infected plants that serve as the initial  
67 inoculum with later infections resulting from aphid transmission. Seed infection can be as  
68 high as 75%, depending on the soybean cultivar and the virus strain, but is usually less than  
69 5% (Rupe & Luttrell, 2008; Sweets, L, 2011).

70 SMV is a member of the genus *Potyvirus*, in the *Potyviridae* family. It has a  
71 monopartite single strand, positive-sense RNA genome that encodes a large polyprotein of  
72 about 350 kDa. This polyprotein is cleaved to yield at least 11 proteins: potyvirus 1 (P1),  
73 helper component proteinase (HC-Pro), potyvirus 3 (P3), PIPO, 6 kinase 1 (6K1),  
74 cylindrical inclusion (CI), 6 kinase 2 (6K2), nuclear inclusion a- viral protein genome  
75 linked (Nia-Vpg), nuclear protein a-protease (NIa-Pro), nuclear inclusion b (NIb) and coat  
76 protein (CP) (R.-H. Wen & Hajimorad, 2010). Several SMV isolates were classified into  
77 different strains based on their differential response in susceptible and resistant soybean  
78 cultivars (Buzzell & Tu, 1984; Cho & Goodman, 1982; S. M. Lim, 1985; Pu et al., 1982;  
79 Zhan et al., 2006). Different types of responses of susceptible and resistant cultivars are the  
80 result of specific interactions between the soybean *R* gene product and the virus avirulence  
81 (*Avr*) gene product. At least three independent loci (*Rsv1*, *Rsv2* and *Rsv4*) in the United  
82 States and several *Rsc* loci in China conferring resistance to different SMV strains have  
83 been reported (Liu et al., 2016). Identification of SMV strains is very important for both  
84 soybean cultivation and breeding. The method based on the pathogenicity has been widely  
85 used; however, this method is laborious and time-consuming. Therefore, genomic  
86 sequences have also been used to differentiate SMV strains in recent years. In this sense,  
87 one of the most variable and informative proteins to compare strains is P1 (Domier et al.,  
88 2003; W. S. Lim et al., 2003).

89 Studying the molecular variability and genetic structure of viruses helps to  
90 provide understanding of their molecular evolutionary history in relation to virulence,  
91 dispersion and emergence of new epidemics (Seo et al., 2009). These studies focused  
92 mainly on phylogenetic relationships between virus isolates, because most of the viruses

93 are constantly evolving through genetic exchanges (recombination), as well as  
94 accumulation of mutations (Choi et al., 2005; Gagarinova et al., 2008; Saruta et al., 2005).  
95 Due to the rapid evolution in avirulence/effector genes, the resistance conditioned by genes  
96 will be quickly overcome and it is important to generate strategies for the management of  
97 viral diseases that are sustainable over time (Liu et al., 2016). In this context, there is a  
98 significant demand to identify plant factors involved in defense responses to pathogens that  
99 can facilitate the design of new sustainable tolerance/resistance strategies against SMV.  
100 Therefore, it is necessary to know the impact of viruses on plant physiology, as well as the  
101 mechanisms and processes involved in the infection.

102         A compatible plant-virus interaction causes deleterious systemic effects on plants  
103 because viruses have the capacity to reprogram the plant metabolism to their own benefit  
104 (Andreola et al., 2019, Zanini et al., 2021). Reprogramming includes suppression of plant  
105 defense responses, reallocation of photoassimilates, redox imbalance, reduced  
106 photosynthesis and induced senescence (Loebenstein & Carr, 2006, Andreola et al., 2019).

107         In Argentina, the isolates G1, G5, G6 (from USA), and MS1 and MS2 (Brazil) were  
108 detected (Truol & Laguna, 1992). In addition, three geographic isolates of this virus,  
109 Marcos Juárez (MJ), Manfredi (M), and northwestern Argentina (NOA), and an isolate  
110 called “PlantaVinosa” (PV), which that causes severe necrotic symptoms in some cultivars,  
111 were collected for further characterization. The aim of the present study was to perform the  
112 biological, physiological and molecular characterization of the latter four isolates.  
113 Therefore, combined information about genetic and physiological alterations in the SMV-  
114 soybean interaction is provided for the first time.

115

116

## MATERIAL AND METHOD

117 *Inoculum source*

118 Plants with SMV symptoms were collected from four soybean-production areas of three  
119 provinces of Argentina: Marcos Juárez (MJ) and Manfredi (M) from Córdoba province,  
120 Salta (NOA) and Santa Fe. The isolate detected in Santa Fe causes severe necrotic  
121 symptoms in some cultivars and was named “Planta Vinosa” (PV), due to the reddish color  
122 observed on stems and petioles, similar to the color of red wine. The inoculums were  
123 multiplied in soybean cv DM 4800 and Davis, through mechanical transmissions, with 0.05  
124 M, pH 7.6 potassium phosphate buffer. Soybean plants were grown under controlled  
125 conditions:  $25 \pm 2$  °C and a 16:8 light: dark photoperiod ( $250 \mu\text{mol photon. m}^{-2}. \text{sec}^{-1}$ ) and  
126 65% humidity.

127 *Biological characterization*

128 *Pathogenicity test*

129 Once multiplied, the four isolates were mechanically transmitted to a group of  
130 differential cultivars (Table 1), as suggested by several authors (Almeida, 1981; Cho &  
131 Goodman, 1982; Shigemori, 1991). The 10 inoculated plants per cultivar/isolate were  
132 maintained under greenhouse conditions ( $25 \text{ °C} \pm 2$ ) until the onset of symptoms. Infection  
133 was confirmed using PTA ELISA (Converse & Martin, 1990), through the analysis of the  
134 last developed trifoliolate leaf. Systemic and local symptoms were recorded.

135 *Aphid transmission*

136 Colonies of *Myzus persicae* Sulzer were bred on *Ipomea setosa* Nil. Two trials were  
137 performed, one using two aphids per plant and the other only one aphid per plant. For  
138 transmission, aphids were starved for 3 to 4 hours, then allowed to feed on soybean plants  
139 infected with the different SMV isolates for a maximum period of one minute (acquisition);  
140 then they were allowed to feed on healthy soybean plants of Forrest cultivar (10  
141 plants/isolate) for approximately 18 hours. The plants were maintained under greenhouse  
142 conditions ( $25\text{ }^{\circ}\text{C} \pm 2$ ) until the evaluation of transmission through visual symptoms and  
143 PTA-ELISA, following a previously described protocol (Converse & Martin, 1990)

#### 144 *Seed transmission*

145 Twenty soybean plants of Forrest cultivar per studied isolate (MJ, M NOA, and PV)  
146 were mechanically inoculated. The inoculated plants were maintained under greenhouse  
147 conditions ( $25 \pm 2\text{ }^{\circ}\text{C}$ ) until maturity, when pots were harvested, and the percentage and  
148 degree of mottled seeds was estimated. To evaluate seed transmission, all the harvested  
149 seeds were sown in individual terrines, and seedlings were analyzed by PTA ELISA using  
150 the first trifoliolate leaf.

#### 151 *Molecular characterization.*

152 Total RNA was extracted from approximately 200 mg of infected leaves using the Trizol  
153 reagent method (Chomczynski & Sacchi, 1987). The obtained RNA was quantified using  
154 the nanodrop® ND-1000 Spectrophotometer.

155 Fragments corresponding to the CI and P1 genomic regions were amplified by RT-  
156 PCR, using the sets of primers described by Kim et al. (2004) and Sherepitko et al. (2011)  
157 (Table 2). RT-PCR was performed with the Access RT-PCR System (Promega Corporation

158 Madison WI USA), using as template 1 µg of RNA of the different isolates. RT-PCR  
159 conditions for the CI segment were as follows: cDNA synthesis at 48 °C for 45 min., 2 min  
160 at 94 °C, followed by 40 cycles of 30 sec at 94 °C, 1 min at 60 °C, and 2 min at 68 °C, with  
161 a final extension of 7 min at 68 °C. To amplify the P1 fragments, thermocycling was  
162 programmed as follows: 48 °C for 45 min., 2 min at 94 °C and 35 cycles of 30 s at 94 °C,  
163 30 sec at 55 °C, 1 min. at 68 °C, and the last extension of 10 min. at 68 °C.

164 Two pairs of primers, CP and NIB-CP (Table 2), were used for the amplification of  
165 the complete CP coding region. The RT-PCR for the CP segment was carried out with the  
166 same reaction mix and conditions as those used for P1. For the NIB-CP fragment  
167 HotStartTaq Master Mix Kit (Qiagen) was used, and the RT-PCR conditions were as  
168 follows: 15 min at 95 °C and 40 cycles of 30 sec at 95 °C, 1 min at 53 °C, 1 min at 72 °C,  
169 and the last extension of 10 min at 72 °C. The amplified products were purified with the  
170 DNA cleaning and concentrator kit (Zymo Research CA, USA), and sequenced at the  
171 Genomic Unit of the Biotechnology Institute-INTA (Argentina). Once obtained, the  
172 sequences of P1, CI and CP were assembled with the Seqman tool (DNASTAR Inc.  
173 Madison, WI, USA).

174 The sequences of each isolate were subsequently compared with each other and with  
175 those of other SMV isolates, available at the National Center of Biotechnology Information  
176 (NCBI - <http://www.ncbi.nlm.nih.gov>), using the Blastn algorithm  
177 (<http://www.ncbi.nlm.nih.gov/BLAST>) (Altschul et al., 1990). Sequence homology was  
178 analyzed with the LASERGENE (DNASTAR Inc. Madison, WI, USA) program. Multiple  
179 alignments were performed with *Clustal W* (<http://www.justbio.com>). Maximum  
180 Likelihood (ML) phylogenetic trees were constructed with MEGA X 5.2 program



181 employing the X as best-fit model with 1000 bootstrap iterations (Kamur et al.,  
182 2018).RDP, GENECONV, MaxChi, BOOTSCAN, Chimaera, 3Seq and SISCAN methods  
183 implemented in the RDP4 (Recombination Detection Program v.4.82) program (Martin et  
184 al. 2015) were used to detect recombination events between the different isolates under  
185 study. Only those events detected by at least three methods were considered positive.

#### 186 *Physiological parameters*

187 *Infection with SMV: Glycine max cv. DM 4800 or Davies plants were infected with*  
188 *M, MJ, NOA and PV isolates. Symptomatic leaves were used to prepare the infected*  
189 *extract with 0.05 M, pH7.6 potassium phosphate buffer. SMV infection was performed at 7*  
190 *days post-germination (dpg) by mechanical damage with carborundum Mesh 600 in the*  
191 *first pair of unifoliate true leaves. The plant was in VC (cotyledon) stage. To evaluate*  
192 *systemically infected leaves, samples were always taken from the first trifoliate leaf at 4*  
193 *days post-inoculation (dpi) (before symptom expression, BS), and 12 dpi (late symptom*  
194 *expression, LS).*

195 *Mock infection:* mechanical damage with carborundum Mesh 600 was induced with  
196 0.05 M, pH7.6 potassium phosphate buffer.

#### 197 *Growth parameters*

198 A total of 12 plants per treatment were harvested at the end of the experiment (12  
199 days dpi). To determine Fresh weight (FW) and Dry weight (DW), aboveground tissues  
200 were individually harvested. For DW measurements, samples were oven-dried at 80 °C  
201 until constant weight was reached. Leaf area was calculated from scanned images of  
202 plants 4 and 12 dpi, using Image Pro Plus ver. 4.5.0.29 for Windows 98/NT/2000 image  
203 analysis software.

204 *Chlorophyll fluorescence*

205 Quantum efficiency of PSII photochemistry under ambient light conditions (250  
206  $\mu\text{mol photon m}^{-2} \text{ sec}^{-1}$ ,  $25 \pm 2 \text{ }^\circ\text{C}$ ) ( $\Phi\text{PSII}$ ) was measured using a pulse amplitude  
207 modulated fluorometer (FMS2, Hansatech Instruments, Pentney King's Lynn, UK).  
208 Furthermore, leaves were dark-adapted using leaf clips for at least 30 min in order to  
209 allow full oxidation of the reaction centers (RC). Then, an actinic 1-sec light pulse of 3500  
210  $\mu\text{mol photons m}^{-2}\text{sec}^{-1}$  was applied to reach the maximum fluorescence emission in order  
211 to measure Fv/Fm.

212 *Lipid peroxidation*

213 Lipid peroxidation levels (determined as thiobarbituric acid reactive substances  
214 (TBARS)) were measured in the first trifoliolate leaf, according to Heath & Packer (1968).  
215 The samples were homogenized using a mortar and pestle under liquid nitrogen and thawed  
216 in 3% (v/v) trichloroacetic acid (TCA) and centrifuged at 13,000 x g, 4  $^\circ\text{C}$  during 15 min.  
217 A fraction (100  $\mu\text{L}$ ) of the sample was mixed with 100  $\mu\text{L}$  of 20% TCA + 0.5%  
218 thiobarbituric acid (TBA) and incubated at 90  $^\circ\text{C}$  for 20 min; then the samples were rapidly  
219 cooled on ice. The mixture was centrifuged at 13,000 x g for 10 min. The supernatant was  
220 immediately measured by spectrophotometer read at 532 nm and 600 nm absorbance.

221 *Total soluble sugars and starch*

222 Extracts were obtained following Guan & Janes (1991); 2 g of frozen tissue were  
223 ground in 2 ml buffer containing 50 mM HEPES-KOH (pH 8.3), 2mM EDTA, 2mM  
224 EGTA, 1mM  $\text{MgCl}_2$ , 1mM  $\text{MnCl}_2$ , and 2mM dithiothreitol (DTT). The extract was  
225 centrifuged at 15,000 rpm at 4  $^\circ\text{C}$  for 15 min and the supernatant was used for soluble sugar  
226 determination. Soluble sugars were measured with anthrone reagent (Fales, 1951) using

227 sucrose as standard. Starch was determined in the pellet from reducing sugars released after  
228 hydrolysis with  $\alpha$  amyloglucosidase, (Schneb & Somers, 1944) using glucose as a standard.

#### 229 *Serological virus detection*

230 Soluble proteins were extracted in coating buffer ( $\text{Na}_2\text{CO}_3/\text{NaHCO}_3$ ), pH 9.6, and  
231 quantified according to Bradford (1976) without SDS. SMV infection was detected by  
232 enzyme-linked immunosorbent assays (PTA-ELISA) using 5  $\mu\text{g}$  of protein per well (Clark  
233 and Adams 1977) with anti-SMV-IgG. Polyclonal SMV antiserum. Bovine serum albumin  
234 was used as standard for calibration curves. In all cases, six healthy samples and one SMV  
235 positive sample per plate were used as controls. Reactions were quantified in Thermo  
236 Labsystem Multiskan MS spectrophotometer and samples were considered positive when  
237 Abs<sub>405</sub> was greater than 0.100 or the mean of healthy controls plus three times the standard  
238 deviation (cut-off). Finally, the relative virus concentration was calculated through the  
239 A<sub>405</sub> of each sample/cut off.

#### 240 *Statistical analysis*

241 The data obtained were subjected to a parametric analysis of variance (ANOVA),  
242 for which the assumptions of Normality and Homogeneity of variances for each variable  
243 used were tested. Significant differences ( $p < 0.05$ ) between treatments were evaluated  
244 using a DGC multiple range test. All these analyses were carried out with the InfoStat 2015  
245 program (<http://www.infostat.com.ar>). Statistical analysis were made between treatments,  
246 and the values were expressed relative to control.

247

248

249

## RESULTS

250

### *1. Biological characterization: Pathogenicity tests, aphids and seed transmission*

251

252

253

254

255

256

257

258

The pathogenicity test performed to characterize the four isolates under study did not allow us to group them with any of the strains previously described by other research groups. The phenotypic severity of the isolates showed differences, with SMV-PV isolate being the most severe one, since it produced mosaic symptoms only in the susceptible cultivar Clark, and caused symptoms of systemic necrosis in the other cultivars, except in Buffalo and PI 483084. On the other hand, the mildest isolate turned out to be NOA, which produced mosaic symptoms in Clark and Davis cultivars, and systemic necrotic symptoms only in the Kwanggyo cultivar (Table 1).

259

260

261

262

263

264

The percentages of transmission by aphids for each isolate, detected by PTA-ELISA, were proportionally similar in both trials (Table 3). The SMV-M, -MJ and -NOA isolates had similarly high percentage of aphid transmission (61%-72%), whereas SMV-PV presented very low transmission capacity (12.5%). Seven days after transmission, all the inoculated plants presented symptoms, such as necrotic and chlorotic local lesions, chlorotic spots and mosaic.

265

266

267

Seeds from the Forrest cultivar originated from plants infected with SMV-M isolate presented the highest percentage of mottling (62%) and the highest rate of seed transmission (13%) (Table 4).

268

### *2. Phylogenetic characterization and recombination analysis of the SMV isolates*

269

270

The complete nucleotide sequences of all the evaluated segments/isolates were deposited in the GenBank database. Accession numbers are listed in Table 5. The

271 percentages of similarity and divergence among isolates for each segment are presented in  
272 Table 6. SMV-NOA and -PV isolates showed a great similarity (97.5-99.6%) in all the  
273 analyzed sequences, whereas a notable divergence (30.6-32.6%) was observed between the  
274 above mentioned isolates and SMV-M and -MJ isolates in the P1 segment.

275 The phylogenetic trees are shown in Fig. 1. SMV-NOA and -PV isolates were closely  
276 related in CP, P1 and CI sequences, and were associated with the P1 segment of the LJZ010  
277 isolate (China). SMV-M isolate grouped with the TNP strain (USA) in the analysis of  
278 fragments P1 and CI, and with strains TNP, G3 and G1 in the analysis of the CP segment.  
279 The SMV-MJ isolate was related to the isolates/races WS101, G6, WS32 and G5, and to  
280 G5H (South Korea) for the P1 and CP fragments.

281 According to the recombination analyses, SMV-NOA, -PV and -M isolates may have  
282 arisen by recombination (Figs 2-3). The P1 segments of SMV-NOA and -PV isolates  
283 presented the same recombination event, with exchange points being nucleotides 690 and  
284 1128 approximately for SMV-NOA, and 690 and 1185 for SMV-PV. LJZ010 and G4 were  
285 detected as the major and minor parental sequences, respectively. On the other hand, in the  
286 analysis of the CI segment, SMV-M isolate, as the NPT strain, would be recombinant  
287 between G4 (parent major) and G3 (parent minor), and the exchange points for SMV-M  
288 were nucleotides 1560 and 1902. The analysis of the CP fragment showed no  
289 recombination events.

### 290 3. *Early physiological alterations caused by the different isolates of SMV*

291 Before the appearance of viral symptom (BS), SMV-NOA produced a differential  
292 behavior in  $\phi$ PPII and MDA content in leaves with respect to the other isolates (Fig. 4b and  
293 F). Likewise, SMV-MJ caused a significant increase in total soluble sugar content with

294 respect to the other isolates (Fig. 4d). All the SMV isolates induced a similar behavior in  
295 terms of Fv/FM, starch content and leaf area (Fig. 4a, c and e),

#### 296 4 *Physiological alterations after viral symptom appearance*

297 In order to analyze the effect of infection by the different virus isolates over time, we  
298 measured Fv/FM, starch content and leaf area in the same leaf, eight days after the early  
299 measurements.

300 SMV-NOA isolate caused an increase in MDA content, whereas (Fig. 5 f) SMV-M  
301 caused an increase in soluble sugar content, starch and MDA, without changes in  $\Phi$ PSII  
302 (Fig. 5 b, d, e and f). SMV-PV isolate did not affect biomass production (Fig. 6). Moreover,  
303 relative viral concentration was measured after the appearance of symptoms, and no  
304 differences were observed among isolates (Supplementary Fig. 1).

305 The SMV-MJ isolate was selected to study the response of two soybean cultivars  
306 susceptible to SMV infection, DM 4800 (DM) and Davis (D). Since the cultivar D showed  
307 lower infectivity than cultivar DM, physiological measurements were taken after the  
308 appearance of macroscopic symptoms (LS stage). Soybean cv Davies showed differential  
309 behavior with respect to DM in leaf area,  $\Phi$ PSII, Fv/Fm and MDA (Fig. 7).

310

311

## DISCUSSION

312 In this study, we performed the biological, molecular and physiological characterization of  
313 four SMV isolates, three geographical isolates (M, MJ and NOA) and one that causes  
314 symptoms of severe necrosis in some cultivars (PV). Although in the analyzed fragments  
315 SMV-PV isolate had high homology with SMV-NOA at the nucleotide level, it differed  
316 from the latter in pathogenicity, percentage of seed mottling, percentage of transmission by

317 seeds and aphids, and plant physiological response. Specifically, those isolates showed  
318 significant differences in the effects on leaf area,  $\Phi$ PSII and MDA content. The presence of  
319 the same recombination event in both isolates and their grouping in the phylogenetic trees  
320 suggest that they could belong to the same SMV race. However, we cannot rule out that the  
321 biological and physiological differences observed in both isolates could be explained by  
322 genetic differences in other parts of the genome. For instance, the interaction between the  
323 VPg protein (protein linked to the viral genome) and the plant transcription initiation factor,  
324 eIF4E, has been demonstrated to have an effect on the inhibition of gene expression during  
325 potyvirus infection due to destabilization of mRNA (Havelda et al., 2008).

326         So far, four independent loci for resistance to SMV have been identified (*Rsv1*, *Rsv3*,  
327 *Rsv4* and *Rsv5*). In addition, multiple resistance alleles were reported for the loci *Rsv1* and  
328 *Rsv3* (Widyasari et al., 2020; Zheng et al., 2005). The emergence of resistance-breaking  
329 isolates can be attributed to the use of resistant cultivars, with a limited base of resistance to  
330 SMV subjected to selection pressure, due to mutations and/or recombination of the  
331 different virus strains (Choi et al., 2005). This may have been the case of SMV-PV isolate,  
332 since it produced a hypersensitive reaction in several cultivars, causing symptoms of  
333 necrosis in stem petioles and veins. In the pathogenicity tests, SMV-PV produced necrotic  
334 symptoms in all the evaluated cultivars, except for Buffalo and PI 483084, which contained  
335 *Rsv1-K* and *Rsv1-h* resistant genes. Proteins P3 and HC-Pro have been shown to be the  
336 effectors of resistance mediated by *Rsv1*. In addition, the amino acids 823, 953 and 1112 of  
337 P3 were found to be important for the induction of the lethal systemic hypersensitive  
338 response (LSRV) (Hajimorad et al., 2006; R. H. Wen et al., 2013). Thus, SMV-PV could  
339 have emerged as a consequence of mutations in P3 and/or HC-Pro cistrons, which broke the

340 resistance conferred, at least, by the alleles *Rsv5*, *Rsv1* *Rsv-1t* and *Rsv1k*. Thus, efforts  
341 should be made to complete the sequencing of these two cistrons with the aim to  
342 understand the biological differences between isolates, mainly considering that SMV-PV  
343 causes severe symptoms of necrosis.

344 CP and HC-Pro have been shown to play an important role in both aphid and seed  
345 transmission, whereas the P1 cistron is also a determinant of seed transmission (Jossey et  
346 al., 2013). The amino acid DAG sequence of the CP is conserved in most potyviruses and is  
347 involved in both types of transmission (seed and aphid). In addition, it has been shown that  
348 SMV induces seed coat mottling, presumably through the action of HC-Pro, which partially  
349 suppresses silencing of the Chalcone synthase (CHS) mRNAs (Atreya et al., 1990; Domier  
350 et al., 2003). With regards to the studied isolates, we found significant differences in  
351 transmission capacity, both by aphids and seeds. SMV-PV isolate showed the lowest aphid  
352 transmission capacity, and both SMV-PV and MJ isolates presented the lowest level of  
353 seed mottling, associated with a lower seed transmission capacity. However, the DAG  
354 motif found in the CP was present in all four isolates.

355 The analysis of the amino acid sequence of P1 showed that homology was greatest  
356 between the SMV-M and -MJ isolates and between SMV-PV and NOA isolates. The SMV-  
357 M isolate is the one that causes the highest percentage and severity of seed spotting, as well  
358 as the highest percentage of transmission by seeds and physiological differences at LS  
359 stage. It has been shown that SMV P1 protein interacts strongly with the Rieske Fe /S  
360 protein of soybean cytochrome b6f (Shi et al., 2007), an essential component of the electron  
361 transport chain in chloroplasts for photosynthesis. The interaction between chloroplast and  
362 the invading virus plays a critical role in viral infection and pathogenesis (Zhao *et al.*,



2016). In this regard, this work, as previous works, showed a decrease in  $\Phi$ PSII and a significant decrease in the CO<sub>2</sub> fixation rate especially for SMV-MJ and PV (Andreola et al., 2019). Chloroplasts are the main source of intracellular reactive oxygen species (ROS) generation in green tissues, mainly under stress conditions. The virus ability to impair chloroplast function and disrupt the photosynthetic electron transport chain ultimately leads not only to the decrease of the carboxylation activity but also to ROS increase (Rodríguez et al. 2010; 2012; Zanini et al. 2021). Our results showed an increase in MDA content in soybean plants inoculated with SMV-NOA and SMV-M isolates at LS stage. MDA is a marker of oxidative lipid damage caused by stress (Arias et al., 2005). Moreover, SMV-NOA was the only isolate that produced an early increase in MDA content, without alteration of  $\Phi$ PSII. These results suggest that oxidative damage measured through MDA in SMV-NOA infected plants before the onset of symptoms might be an early cellular oxidative process rather than the result of damage at the chloroplast level. Likewise, since SMV-NOA and -PV had high homology sequences in the analyzed fragment, we suggest that the physiological response at the chloroplast level could be related to other sequences that should be further explored.

Chloroplast alteration during SMV infection might be directly related to soluble sugar production. Present and previous results of our group have shown an increase in soluble sugars with SMV-MJ infection (Andreola et al., 2019). It is possible that the increase in soluble sugars observed in the compatible interaction between soybean and all SMV isolates is associated with the recycling of cellular components resulting from chloroplast damage. The accumulation of soluble sugars and the decrease in the  $\Phi$ PSII and Fv/Fm suggest that the increase could be related to a greater import or lower export of sugars, or

386 from intracellular recycling (Rodriguez et al., 2010; Andreola et al., 2019). These possible  
387 sugar sources are not mutually exclusive but might be operating in combination, and have  
388 to be explored in future studies.

389 SMV-MJ, one of the most severe isolates in terms of the reactions it produces in  
390 differential cultivars, showed early sugar alteration. On the other hand, the differential  
391 behavior of that virus isolate was found to occur not only between cultivars with different  
392 resistance (Cho and Goodman, 1979) or between susceptible and resistant cultivars (Arias  
393 et al., 2005), but also between susceptible cultivars. The soybean cv Davis (D) showed  
394 more severe symptoms than DM 4800 (DM) not only when infected with the SMV-MJ  
395 isolate in this work, but also when infected with the SMV-M isolate, which showed severe  
396 necrosis in the infected plants (unpublished data). Likewise, mechanical transmission had  
397 low efficiency in the SMV-M, SMV-NOA and SMV-PV isolates, suggesting a differential  
398 interaction of the same viral genome with different susceptible host plant genomes. In  
399 conclusion, knowing the physiological bases of viral infections and the mechanisms  
400 underlying plant infection by different races of viruses will contribute to the development  
401 of plants with tolerance to viral diseases.

402 **Compliance with ethical standards**

403 **Conflict of interest.** No potential conflicts of interest are disclosed.

404 **Research involving human participants and/or animals.** The research involved neither  
405 human participants nor animals.

406 **Informed consent** not applicable.

407

408

## REFERENCES

- 409 Almeida, A. M. R. (1981). Identificação de estirpes do virus do mosaico comum da soja no  
410 estado do Paraná. *Fitopatologia Brasileira*, 6, 281–286.
- 411 Altschul, S. F., Gish, W., Miller, W., Myers, E. W., & Lipman, D. J. (1990). Basic local  
412 alignment search tool. *Journal of Molecular Biology*, 215(3), 403–410.  
413 [https://doi.org/10.1016/S0022-2836\(05\)80360-2](https://doi.org/10.1016/S0022-2836(05)80360-2)
- 414 Andreola, S., Rodriguez, M., Parola, R., Alemano, S., & Lascano, R. (2019). Interactions  
415 between soybean, *Bradyrhizobium japonicum* and Soybean mosaic virus: The effects  
416 depend on the interaction sequence. *Functional Plant Biology*, 46(11), 1036–1048.  
417 <https://doi.org/10.1071/FP17361>
- 418 Arias, M.C., Luna, C., Rodríguez, M., Lenardon, S., Taleisnik, E., 2005. Sunflower  
419 chlorotic mottle virus in compatible interactions with sunflower: ROS generation and  
420 antioxidant response. *Eur. J. Plant Pathol.* 113, 223–232. doi:10.1007/s10658-005-  
421 7559-5
- 422 Atreya, C. D., Raccach, B., & Pirone, T. P. (1990). A point mutation in the coat protein  
423 abolishes aphid transmissibility of a potyvirus. *Virology*, 178(1). 161-165.  
424 [https://doi.org/10.1016/0042-6822\(90\)90389-9](https://doi.org/10.1016/0042-6822(90)90389-9)
- 425 Balachandran, S., Hurry, V. M., Kelley, S. E., Osmond, C. B., Robinson, S. A., Rohozinski,  
426 J., Seaton, G. G. R., & Sims, D. A. (1997). Concepts of plant biotic stress. Some  
427 insights into the stress physiology of virus-infected plants, from the perspective of  
428 photosynthesis. *Physiologia Plantarum*, 100(2), 203–213.  
429 <https://doi.org/10.1111/j.1399-3054.1997.tb04776.x>
- 430 Buzzell, R. I., & Tu, J. C. (1984). Inheritance of soybean resistance to soybean mosaic  
431 virus. *Journal of Heredity*, 75(1), 82–82.

- 432 <https://doi.org/10.1093/oxfordjournals.jhered.a109878>
- 433 Cho, E. K., & Goodman, R. M. (1982). Evaluation of Resistance in Soybeans to Soybean  
434 Mosaic Virus Strains 1. *Crop Science*, 22(6), 1133–1136.  
435 <https://doi.org/10.2135/cropsci1982.0011183x002200060012x>
- 436 Choi, B. K., Koo, J. M., Ahn, H. J., Yum, H. J., Choi, C. W., Ryu, K. H., Chen, P., & Tolin,  
437 S. A. (2005). Emergence of Rsv-resistance breaking Soybean mosaic virus isolates  
438 from Korean soybean cultivars. *Virus Research*, 112(1–2), 42–51.  
439 <https://doi.org/10.1016/j.virusres.2005.03.020>
- 440 Chomczynski, P., & Sacchi, N. (1987). Single-step method of RNA isolation by acid  
441 guanidinium thiocyanate-phenol-chloroform extraction. *Analytical Biochemistry*,  
442 162(1), 156–159. [https://doi.org/10.1016/0003-2697\(87\)90021-2](https://doi.org/10.1016/0003-2697(87)90021-2)
- 443 Chowda-Reddy, R. V., Sun, H., Chen, H., Poysa, V., Ling, H., Gijzen, M., & Wang, A.  
444 (2011). Mutations in the P3 protein of Soybean mosaic virus G2 isolates determine  
445 virulence on Rsv4-genotype Soybean. *Molecular Plant-Microbe Interactions*, 24(1),  
446 37–43. <https://doi.org/10.1094/MPMI-07-10-0158>
- 447 Converse, R. H., & Martin, R. R. (1990). ELISA methods for plant viruses. In R. Hampton,  
448 E. Ball, & S. De Boer (Eds.), *Serological Methods for Detection and Identification of*  
449 *Viral and Bacterial Plant Pathogens* (pp. 179–196). APS Press.
- 450 Domier, L. L., Latorre, I. J., Steinlage, T. A., McCoppin, N., & Hartman, G. L. (2003).  
451 Variability and transmission by Aphis glycines of North American and Asian Soybean  
452 mosaic virus isolates. *Archives of Virology*, 148(10), 1925–1941.  
453 <https://doi.org/10.1007/s00705-003-0147-0>
- 454 FOASTAT. (2019). *Food and Agriculture Organization of the United Nations*.

- 455 <http://www.fao.org/faostat/es/#data/QC>
- 456 Gagarinova, A. G., Babu, M., Strömvik, M. V., & Wang, A. (2008). Recombination  
457 analysis of Soybean mosaic virus sequences reveals evidence of RNA recombination  
458 between distinct pathotypes. *Virology Journal*, 5(1), 143.  
459 <https://doi.org/10.1186/1743-422X-5-143>
- 460 Guan, H. P., & Janes, H. W. (1991). Light regulation of sink metabolism in tomato fruit I.  
461 Growth and sugar accumulation. *Plant Physiology*, 96(3), 916–921.  
462 <https://doi.org/10.1104/pp.96.3.916>
- 463 Hajimorad, M. R., Domier, L. L., Tolin, S. A., Whitham, S. A., & Saghai Maroof, M. A.  
464 (2018). Soybean mosaic virus: a successful potyvirus with a wide distribution but  
465 restricted natural host range. *Molecular Plant Pathology*, 19(7), 1563–1579.  
466 <https://doi.org/10.1111/mpp.12644>
- 467 Hajimorad, M. R., Eggenberger, A. L., & Hill, J. H. (2006). Strain-specific P3 of Soybean  
468 mosaic virus elicits Rsv1-mediated extreme resistance, but absence of P3 elicitor  
469 function alone is insufficient for virulence on Rsv1-genotype soybean. *Virology*,  
470 345(1), 156–166. <https://doi.org/10.1016/j.virol.2005.09.055>
- 471 Havelda, Z., Várallyay, É., Válóczy, A., Burgyán, J. (2008). Plant virus infection-induced  
472 persistent host gene downregulation in systemically infected leaves. *Plant J.* 55, 278–  
473 288. doi:10.1111/j.1365-313X.2008.03501.x
- 474 Heath, R. L., & Packer, L. (1968). Photoperoxidation in isolated chloroplasts. *Archives of*  
475 *Biochemistry and Biophysics*, 125(1), 189–198. [https://doi.org/10.1016/0003-](https://doi.org/10.1016/0003-9861(68)90654-1)  
476 [9861\(68\)90654-1](https://doi.org/10.1016/0003-9861(68)90654-1)
- 477 Hill, J. H., Benner, H. I., & Deussen, R. A. (1994). Rapid Differentiation of Soybean Mosaic

- 478 Virus Isolates by Antigenic Signature Analysis. *Journal of Phytopathology*, 142(2),  
479 152–162. <https://doi.org/10.1111/j.1439-0434.1994.tb04525.x>
- 480 Hill, J. H., Benner, H. I., Permar, T. A., Bailey, T. B., Andrews, J. R. E., Durand, D. P., &  
481 Van Deusen, R. A. (1989). Differentiation of Soybean mosaic virus isolates by one-  
482 dimensional trypsin peptide maps immunoblotted with monoclonal antibodies.  
483 *Phytopathology*, 79, 1261–1265.
- 484 Jossey, S., Hobbs, H. A., & Domier, L. L. (2013). Role of soybean mosaic virus-encoded  
485 proteins in seed and aphid transmission in soybean. *Phytopathology*, 103(9), 941–948.  
486 <https://doi.org/10.1094/PHYTO-09-12-0248-R>
- 487 Khatabi, B., Wen, R. H., Hershman, D. E., Kennedy, B. S., Newman, M. A., & Hajimorad,  
488 M. R. (2012). Generation of polyclonal antibodies and serological analyses of  
489 nucleocapsid protein of Soybean vein necrosis-associated virus: A distinct soybean  
490 infecting tospovirus serotype. *European Journal of Plant Pathology*, 133(4), 783–790.  
491 <https://doi.org/10.1007/s10658-012-9969-5>
- 492 Kim, Y. H., Kim, O. S., Roh, J. H., Moon, J. K., Sohn, S. I., Lee, S. C., & Lee, J. Y. (2004).  
493 Identification of Soybean mosaic virus strains by RT-PCR/RFLP analysis of  
494 cylindrical inclusion coding region. *Plant Disease*, 88(6), 641–644.  
495 <https://doi.org/10.1094/PDIS.2004.88.6.641>
- 496 Kumar, S., Stecher, G., Li, M., Knyaz, C. & Tamura, K. (2018) MEGA X: Molecular  
497 Evolutionary Genetics Analysis across Computing Platforms. *Mol. Biol. Evol.* 35(6),  
498 1547-1549. doi:10.1093/molbev/msy096.
- 499 Leonard, S., Plante, D., Wittmann, S., Daigneault, N., Fortin, M. G., y Laliberte, J. F.  
500 (2000). Complex formation between Potyvirus VPg and translation eukaryotic

- 501 initiation factor 4E correlates with virus infectivity. *Journal of Virology* 74, 7730-  
502 7737.
- 503 Lim, S. M. (1985). Resistance to Soybean Mosaic Virus in Soybeans. *Phytopathology.*, 75,  
504 199–201.
- 505 Lim, W. S., Kim, Y. H., & Kim, K. H. (2003). Complete Genome Sequences of the  
506 Genomic RNA of Soybean mosaic virus Strain G7H and G5. *Plant Pathol. J.*, 19(3),  
507 171–176.
- 508 Liu, J. Z., Fang, Y., & Pang, H. (2016). The current status of the Soybean-Soybean Mosaic  
509 Virus (SMV) pathosystem. *Frontiers in Microbiology*, 7(NOV), 1906.  
510 <https://doi.org/10.3389/fmicb.2016.01906>
- 511 Loebenstein, G., & Carr, J. P. (2006). *Natural Resistance Mechanisms of Plants to Viruses*  
512 (G. Loebenstein & J. P. Carr (eds.)). Springer.
- 513 Lucas, B. S., & Hill, J. H. (1980). Characteristics of the Transmission of Three Soybean  
514 Mosaic Virus Isolates by *Myzus persicae* and *Rhopalosiphum maidis*. *Journal of*  
515 *Phytopathology*, 99(1), 47–53. <https://doi.org/10.1111/j.1439-0434.1980.tb03759.x>
- 516 Martin, D. P., Murrell, B., Golden, M., Khoosal, A., & Muhire, B. (2015). RDP4: Detection  
517 and analysis of recombination patterns in virus genomes. *Virus Evolution*, 1(1).  
518 <https://doi.org/10.1093/ve/vev003>
- 519 Pu, Z. Q. ., Cao, Q. ., Fang, D. C. ., Xue, B. D. ., & Fang, Z. D. (1982). Identification of  
520 strains of Soybean mosaic virus. *Acta Phytophylacica Sinica*, 9, 15–20.
- 521 Rodriguez, M., Taleisnik, E., Lenardon, S., Lascano, R., (2010). Are Sunflower chlorotic  
522 mottle virus infection symptoms modulated by early increases in leaf sugar  
523 concentration? *J. Plant Physiol.* 167, 1137–1144. doi:10.1016/j.jplph.2010.03.004

- 524 Rupe, J., & Luttrell, R. G. (2008). Effect of Pests and Diseases on Soybean Quality. In  
525 *Soybeans: Chemistry, Production, Processing, and Utilization* (pp. 93–116). Elsevier  
526 Inc. <https://doi.org/10.1016/B978-1-893997-64-6.50007-X>
- 527 Saruta, M., Kikuchi, A., Okabe, A., & Sasaya, T. (2005). Molecular characterization of A2  
528 and D strains of Soybean mosaic virus, which caused a recent virus outbreak in  
529 soybean cultivar Sachiyutaka in Chugoku and Shikoku regions of Japan. *Journal of*  
530 *General Plant Pathology*, 71(6), 431–435. <https://doi.org/10.1007/s10327-005-0235-y>
- 531 Schneb, J. B., & Somers, G. F. (1944). The water soluble polysaccharides of sweet corn.  
532 *Arch. Biochem.*, 4, 7–9.
- 533 Seo, J.-K., Ohshima, K., Lee, H.-G., Son, M., Choi, H.-S., Lee, S.-H., Sohn, S.-H., & Kim,  
534 K.-H. (2009). Molecular variability and genetic structure of the population of Soybean  
535 mosaic virus based on the analysis of complete genome sequences. *Virology*, 393(1),  
536 91–103. <https://doi.org/10.1016/j.virol.2009.07.007>
- 537 Seo, J. K., Lee, S. H., & Kim, K. H. (2009). Strain-specific cylindrical inclusion protein of  
538 soybean mosaic virus elicits extreme resistance and a lethal systemic hypersensitive  
539 response in two resistant soybean cultivars. *Molecular Plant-Microbe Interactions*,  
540 22(9), 1151–1159. <https://doi.org/10.1094/MPMI-22-9-1151>
- 541 Sherepitko, D. V., Budzanivska, I. G., Polischuk, V. P., & Boyko, A. L. (2011). Partial  
542 sequencing and phylogenetic analysis of Soybean mosaic virus isolated in Ukraine.  
543 *Biopolymers and Cell*, 27(6), 472–479. <https://doi.org/10.7124/bc.00011A>
- 544 Shi Y, Chen J, Hong X, Chen J, Adams MJ. (2007). A potyvirus P1 protein interacts with  
545 the Rieske Fe/S protein of its host. *Mol Plant Pathol.* 8(6), 785-790. doi:  
546 10.1111/j.1364-3703.2007.00426.x. PMID: 20507538.



- 547 Shigemori, I. (1991). Studies on the breeding on soybeans for resistance to soybean mosaic  
548 virus (SMV). *Bulletin of The Nagano Chushin Agricultural Experiment Station*, 10-  
549 undefined.
- 550 Sweets, L. (2011). *Discolored Soybean Seed // Integrated Crop and Pest Management*  
551 *News Article // Integrated Pest Management, University of Missouri.*  
552 <https://ipm.missouri.edu/IPCM/2011/9/Discolored-Soybean-Seed/>
- 553 Tamura, K., Peterson, D., Peterson, N., Stecher, G., Nei, M., & Kumar, S. (2011). MEGA5:  
554 Molecular evolutionary genetics analysis using maximum likelihood, evolutionary  
555 distance, and maximum parsimony methods. *Molecular Biology and Evolution*,  
556 28(10), 2731–2739. <https://doi.org/10.1093/molbev/msr121>
- 557 Truol, G., & Laguna, I. G. (1992). Identificación de razas del Virus del mosaico de la soja  
558 (Soybean mosaic virus) presentes en Argentina. *Revista de Investigaciones*  
559 *Agropecuarias, XXIII*, 41–51.
- 560 Wen, R.-H., & Hajimorad, M. R. (2010). Mutational analysis of the putative pipo of  
561 soybean mosaic virus suggests disruption of PIPO protein impedes movement.  
562 *Virology*, 400, 1–7. <https://doi.org/10.1016/j.virol.2010.01.022>
- 563 Wen, R. H., Khatabi, B., Ashfield, T., Maroof, M. A. S., & Hajimorad, M. R. (2013). The  
564 HC-Pro and P3 cistrons of an avirulent soybean mosaic virus are recognized by  
565 different resistance genes at the complex rsv1 locus. *Molecular Plant-Microbe*  
566 *Interactions*, 26(2), 203–215. <https://doi.org/10.1094/MPMI-06-12-0156-R>
- 567 Widyasari, K., Alazem, M., & Kim, K. H. (2020). Soybean resistance to soybean mosaic  
568 virus. In *Plants* (Vol. 9, Issue 2, p. 219). MDPI AG.  
569 <https://doi.org/10.3390/plants9020219>

- 570 Zhan, Y., Zhi, H. J., Yu, D. Y., & Gai, J. Y. (2006). Identification and distribution of SMV  
571 strains in Huang-Huai Valleys. *Scientia Agricultura Sinica*, 39, 2009–2015.
- 572 Zheng, C., Chen, P., & Gergerich, R. (2005). Characterization of Resistance to Soybean  
573 mosaic virus in Diverse Soybean Germplasm. *Crop Science*, 45(6), 2503–2509.  
574 <https://doi.org/10.2135/cropsci2005.0114>  
575

**Table 1** Reactions of differential soybean varieties to four soybean mosaic virus isolates from Argentina

| CULTIVAR   | Genotype | G1         | G2       | G3         | G4       | G5         | G6  | G7   | Marcos<br>Juarez | Manfredi | NOA  | PV   |
|------------|----------|------------|----------|------------|----------|------------|-----|------|------------------|----------|------|------|
| <b>I</b>   |          |            |          |            |          |            |     |      |                  |          |      |      |
| Clark      | rsv      | -/M        | -/M      | -/M        | -/M      | -/MN       | -/M | -/M  | N/M              | N/M      | N/M  | N/M  |
| Davis      | rsv      | -/-        | -/-      | -/-        | N/MN     | -/M        | -/M | -/M  | N/MN             | N/-      | N/M  | N/MN |
| York       | Rsv-5    | -/-        | -/-      | -/-        | N/MN     | -/MN       | -/M | -/M  | N/MN             | N/N      | -/-  | N/MN |
| Ogden      | Rsv-1t   | -/-        | -/-      | N/N        | -/-      | -/-        | -/- | N/N  | -/-              | N/MN     | -/-  | -/N  |
| Kwanggyo   | Rsv-1K   | -/-        | -/-      | -/-        | -/-      | N/N        | N/N | N/N  | N/N              | -/-      | N/N  | N/MN |
| Bufalo     | Rsv-1b   | -/-        | -/-      | -/-        | -/-      | -/-        | -/- | N/N  | -/-              | N/-      | N/-  | N/-  |
| <b>II</b>  |          |            |          |            |          |            |     |      |                  |          |      |      |
|            |          | <b>MS1</b> |          | <b>MS2</b> |          | <b>MS3</b> |     |      |                  |          |      |      |
| Clark      | rsv      | M          |          | M          |          | M          |     | N/M  | N/M              | N/M      | N/M  | N/M  |
| Davis      | rsv      | -          |          | -          |          | M          |     | N/MN | N/-              | N/M      | N/MN | N/MN |
| York       | Rsv-5    | M          |          | M          |          | M          |     | N/MN | N/N              | -/-      | N/MN | N/MN |
| Ogden      | Rsv-1t   | -          |          | M N        |          | M N        |     | -/-  | N/NM             | -/-      | -/N  | -/N  |
| Kwanggyo   | Rsv-1K   | -          |          | M LL       |          | M          |     | N/N  | -/-              | N/N      | N/MN | N/MN |
| Bufalo     | Rsv-1b   | -          |          | -          |          | N          |     | -/-  | N/-              | N/-      | N/-  | N/-  |
| <b>III</b> |          |            |          |            |          |            |     |      |                  |          |      |      |
|            |          | <b>A</b>   | <b>B</b> | <b>C</b>   | <b>D</b> | <b>E</b>   |     |      |                  |          |      |      |
| Clark      | rsv      | M          | M        | M          | M        | M          | M   | M    | M                | M        | M    | M    |
| Davis      | rsv      | .          | .        | M          | M        | N          | N   | N    | N                | -        | M    | N    |
| York       | Rsv-5    | .          | .        | M          | M        | N          | N   | N    | N                | N        | -    | N    |
| Ogden      | Rsv-1t   | N          | N        | N          | N        | .          | .   | .    | N                | N        | -    | N    |
| kwanggyo   | Rsv-1K   | .          | .        | M          | M        | N          | N   | N    | N                | -        | N    | N    |
| Bufalo     | Rsv-1b   | .          | .        | N          | N        | .          | .   | .    | -                | -        | -    | -    |
| PI 96983   | Rsv-1t   | .          | .        | .          | N        | .          | .   | N    | N                | -        | -    | N    |
| PI 483084  | Rsv-1h   | .          | .        | .          | .        | N          | .   | .    | .                | -        | -    | -    |

577 References: Differential Cultivars described by I Cho y Goodman (1982), II Almeida (1981), III Shigemori (1991), **VN**= vein necrosis,  
578 **M**= mosaic, **N**= necrosis, **LL**= local lesion, **S**= symptoms on non-inoculated primary leaves, ( )= indiscernible, -/- = reaction on  
579 inoculated primary leaves/ reactions on non-inoculated trifoliolate leaves.

580 **Table 2** Primers used to amplify the CP, P1 and CI genomic regions

| Genomic region | Primer               | Primer sequence                                                    | Fragment size |
|----------------|----------------------|--------------------------------------------------------------------|---------------|
| CP             | SMV-CPf<br>SMV-CPr   | 5'-CAAGCAGCAAAGATGTAAATG-3'<br>5'-GTCCATATCTAGGCATATACG-3'         | 469 pb        |
| P1             | SMV-P1f<br>SMV-P1r   | 5'-AGTCAAATGGCAACAATCATG-3'<br>5'-GGGAGTAGTGCTGAATATCC-3'          | 934 pb        |
| CI             | SMV CI5'<br>SMV CI3' | 5'-GCATTCAACTGTGCGCTTAAAGAAT-3'<br>5'-TTGAGCTGCAAAAATTTACTCACTT-3' | 1385 pb       |
| NIB-CP         | NIB-CPF<br>NIB-CPR1  | 5'-AGCAAAGAGCTTATGCATC-3'<br>5'- CCTTCAACCATTGGAAGATTCA-3          | 500 pb        |

581

582

583 **Table 3** Transmissibility (%) of soybean mosaic virus Argentine isolates by *Myzus persicae*

|                          | M           | NOA       | MJ        | PV          |
|--------------------------|-------------|-----------|-----------|-------------|
| <b>2 aphid per plant</b> | <b>72</b>   | <b>67</b> | <b>61</b> | <b>12,5</b> |
| <b>1 aphid per plant</b> | <b>37,5</b> | <b>38</b> | <b>20</b> | <b>10</b>   |

584

585 **Table 4** Seed transmission and mottling by different soybean mosaic virus isolates in Forrest  
586 cultivar.

| Isolate              | % of not spotted seeds | % spotted seeds | Mottling severity* | % seed transmission (DAS-ELISA) |
|----------------------|------------------------|-----------------|--------------------|---------------------------------|
| <b>Planta Vinosa</b> | 65                     | 35              | 1-2                | 7                               |
| <b>Marcos Juarez</b> | 58                     | 35              | 1-2                | 7                               |
| <b>NOA</b>           | 60                     | 39              | 1-3                | 10                              |
| <b>Manfredi</b>      | 38                     | 62              | 1-4                | 13                              |

587 \* Mottling severity 1: Mottling covers less than 20% of the seed surface 2: Mottling covers  
588 between 20 and 40% % of the seed surface 3: Mottling covers between 40 and 60% % of the seed  
589 surface 4: Mottling covers more than 60% of the seed surface

590

591 **Table 5** GenBank Accession numbers of three regions of Soybean mosaic virus genome,  
 592 corresponding to four different Argentine isolates.  
 593

| Soybean mosaic virus region | Isolate | GenBank Accession number |
|-----------------------------|---------|--------------------------|
| P1                          | M       | MH746624                 |
| P1                          | MJ      | MH763836                 |
| P1                          | NOA     | MH795799                 |
| P1                          | PV      | MH785076                 |
| CI                          | M       | MH672689                 |
| CI                          | MJ      | MH683726.                |
| CI                          | NOA     | MH678613.                |
| CI                          | PV      | MH688059                 |
| Nib-CP                      | M       | MW187865                 |
| Nib-CP                      | MJ      | MW187866                 |
| Nib-CP                      | NOA     | MW187867                 |
| Nib-CP                      | PV      | MW187868                 |

594

595 **Table 6** Percentages of similarity and divergence between the four soybean mosaic virus isolates

| Segment   | Isolates | Similarity (%) |      |             | Divergence (%) |             |             |
|-----------|----------|----------------|------|-------------|----------------|-------------|-------------|
|           |          | MJ             | NOA  | PV          | MJ             | NOA         | PV          |
| <b>P1</b> | M        | 95.9           | 53.1 | 53.6        | 4.2            | <b>31.4</b> | <b>30.6</b> |
|           | MJ       | -              | 51.1 | 51.4        | -              | <b>32.3</b> | <b>31.9</b> |
|           | NOA      | -              | -    | <b>99.1</b> | -              | -           | 0.9         |
| <b>CI</b> | M        | 90.2           | 97.8 | 97.7        | 10.8           | 2.2         | 2.3         |
|           | MJ       | -              | 91   | 91          | -              | 9.8         | 9.8         |
|           | NOA      | -              | -    | <b>99.5</b> | -              | -           | 0.6         |

|           |     |      |      |             |     |     |     |
|-----------|-----|------|------|-------------|-----|-----|-----|
| <b>CP</b> | M   | 92.8 | 94   | 95.2        | 7.8 | 6.4 | 5   |
|           | MJ  | -    | 96.7 | 94.2        | -   | 3.4 | 6   |
|           | NOA | -    | -    | <b>97.5</b> | -   | -   | 2.5 |

596

597

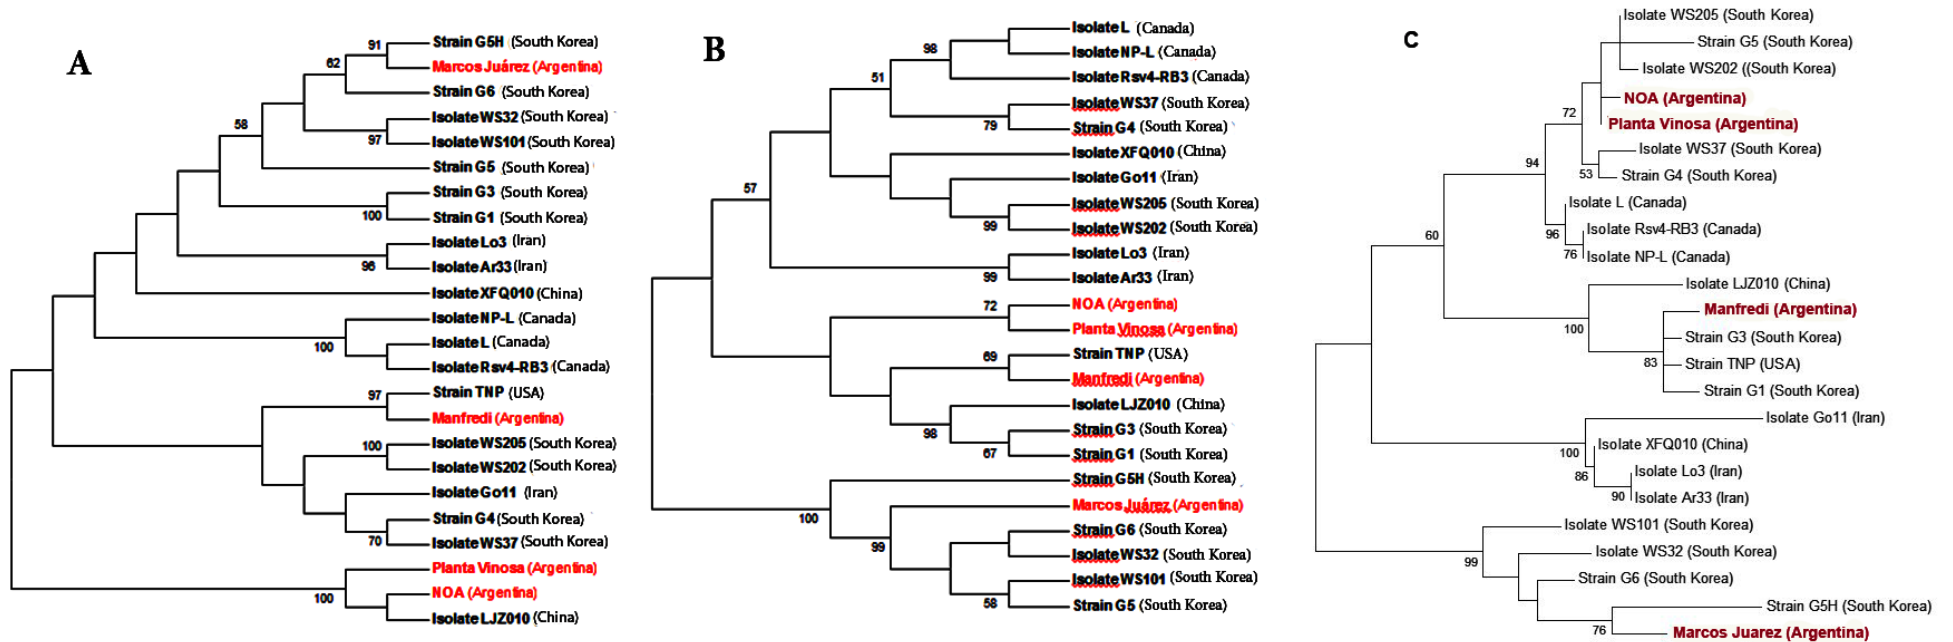

608

609 **Fig. 1** Phylogenetic trees based on the nucleotide sequences of P1 (a). CI (b) and CP (c) segments of MJ. PV. NOA and M. Soybean  
 610 mosaic virus isolates and other selected soybean mosaic virus strains. Bootstrap values (1000 replicates) are indicated at nodes  
 611 GeneBank accessions of the soybean mosaic virus strains are: **TNP**: HQ845735; **Rsv4-RB3**: JN416770; **L**: EU871724; **NP-L**:  
 612 HQ166266. **WS32**: FJ640954; **WS37**: FJ640955; **WS101**: FJ640957, **WS202**: FJ640974; **WS205**: FJ640975; **G1**: FJ640977. **G3**:  
 613 FJ640978; **G4**:FJ640979; **G5**:AY294044; **G6**:AF242845; **G5H**:FJ807701; **Go11**:KF135491; **Lo3**:KF135490; **Ar33**:KF297335;  
 614 **LJZ010**:KP710866; **XFQ010**:KP710874.

615



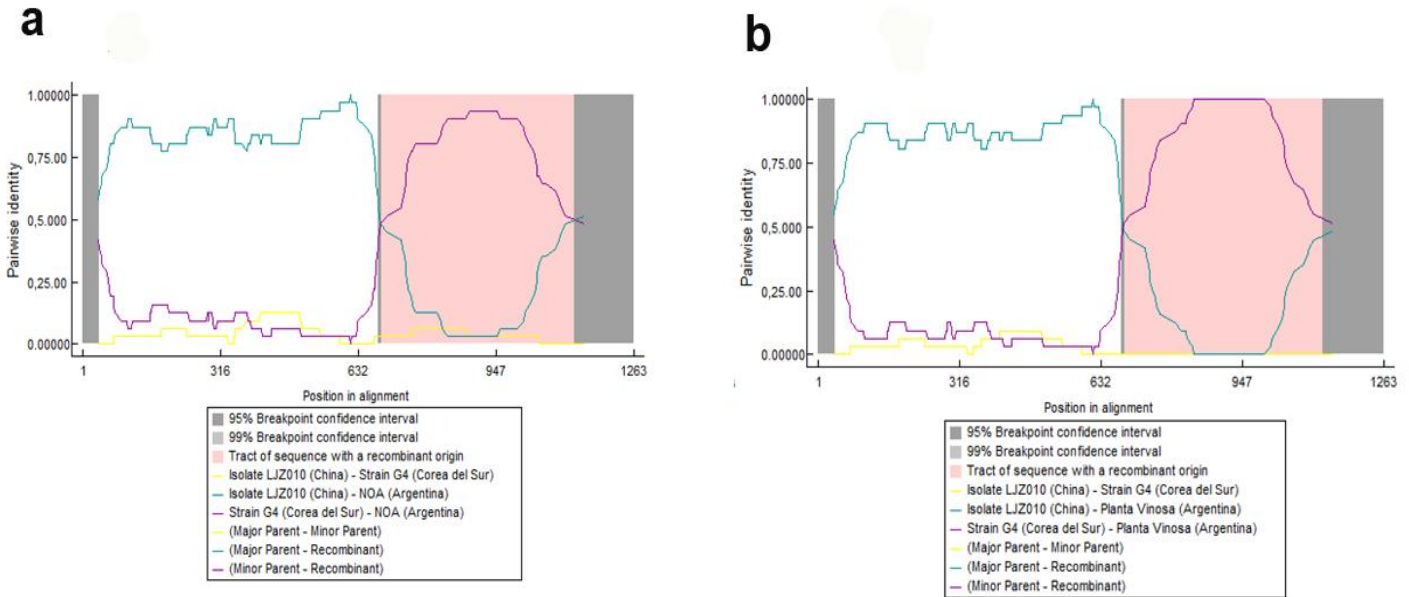

624

625 **Fig. 2** DNA Recombination events detected in the P1 segment of NOA (a) and PV (b) isolate  
626 with parental LJZ010 (light blue) and G4 (violet); the corresponding breakpoints are included.

627

628

629

630

631

632

633

634

635

636

637

638

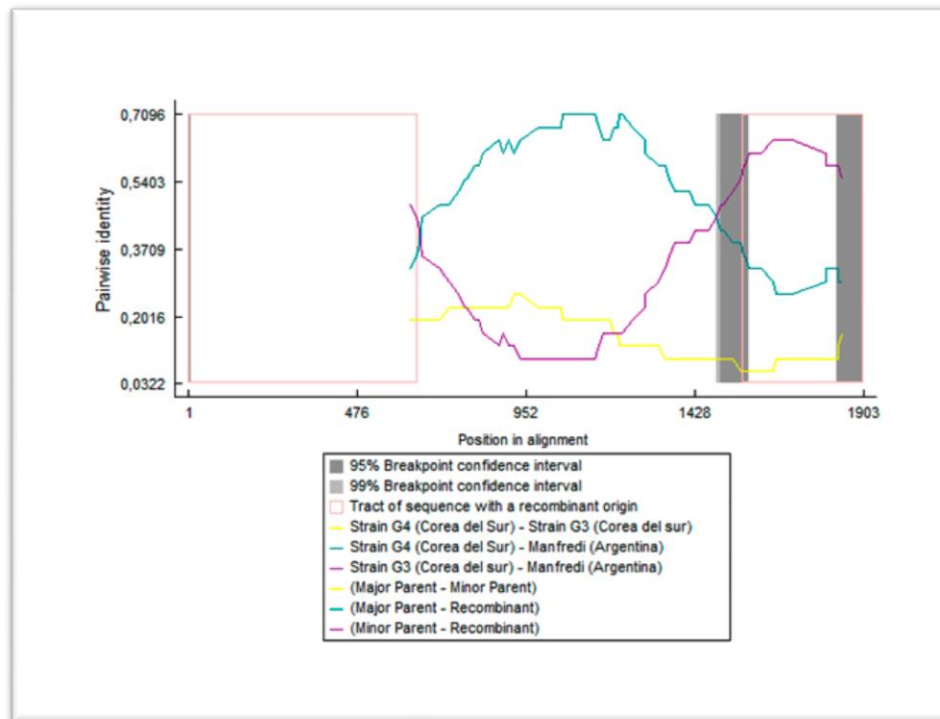

639 **Fig. 3** Recombination events detected in the CI segment of M isolate with parental LJZ010 (light  
640 blue) and G4 (violet); the corresponding breakpoints are included.

641

642

643

644

645

646

647

648

649

650

651

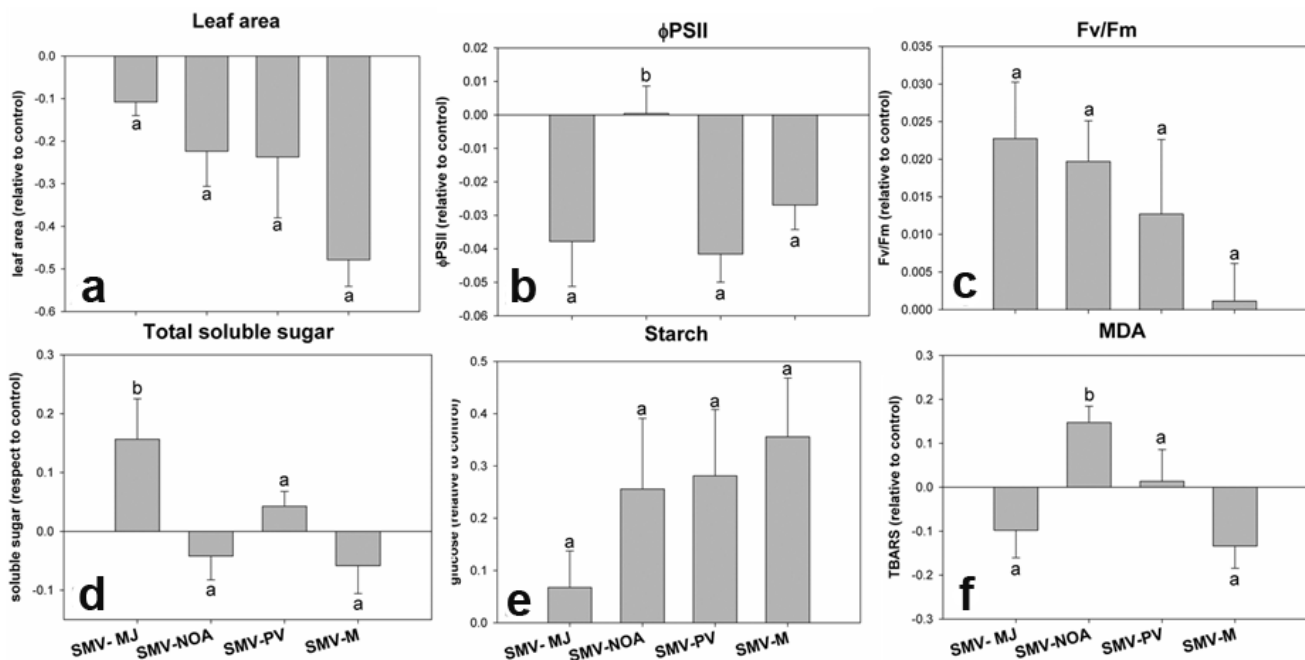

652 **Fig. 4.** Early physiological alterations induced by different SMV isolates in soybean plants before  
653 macroscopic symptom appearance. **a.** leaf area; **b.**  $\Phi$ PSII; **c.** Fv / Fm; **d.** Total soluble sugars; **e.**  
654 Starch; **f.** MDA. Sampling was carried out on the first trifoliolate leaf 4 days after inoculation.  
655 Results are expressed as means  $\pm$  SE of three independent experiments with at least three  
656 biological replicates each. Different letters indicate significant differences between treatments  
657 (DGC test.  $p < 0.05$ ).

658

659

660

661

662

663

664  
665  
666  
667  
668  
669  
670  
671  
672  
673

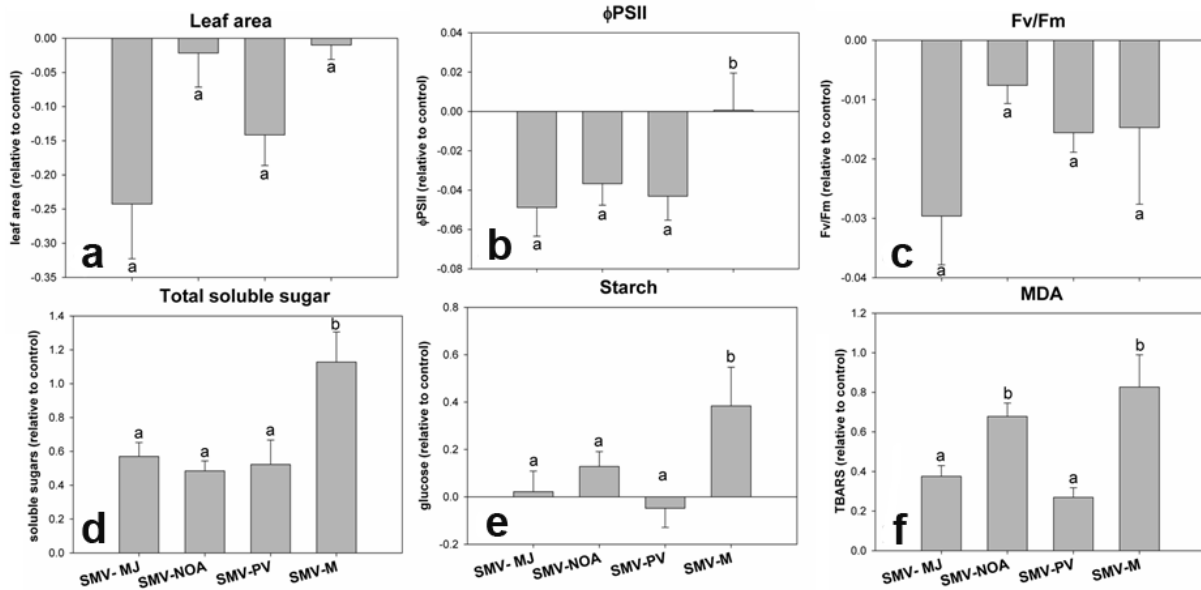

674 **Fig. 5.** Physiological alterations induced by different isolates of SMV in soybean plants after the  
675 appearance of mosaic symptoms. **a.** leaf area; **b.**  $\Phi$ PSII; **c.** Fv/Fm; **d.** Total soluble sugars; **e.**  
676 Starch; **f.** MDA. Sampling was carried out 12 days post-inoculation on the first trifoliolate leaf.  
677 Results are expressed as means  $\pm$  SE of three independent experiments with at least three  
678 biological replicates each. Different letters indicate significant differences between treatments  
679 (DGC test.  $p < 0.05$ )

680  
681  
682  
683  
684  
685  
686  
687  
688  
689

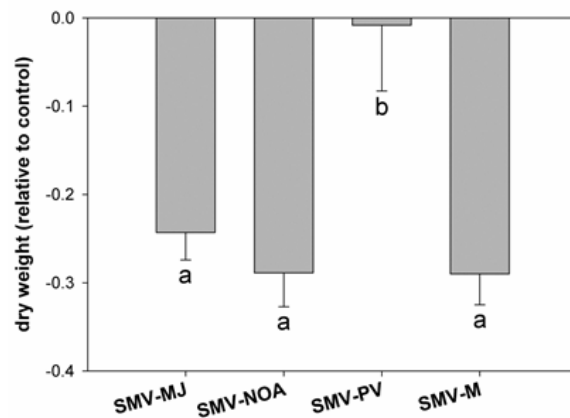

690 **Fig. 6** Dry weight of aboveground with respect to healthy control measured at 12 dpi (LS).  
691 Results are expressed as mean  $\pm$  SE of three independent experiments with at least three  
692 biological replicates each. Different letters indicate significant differences between treatments  
693 (DGC test.  $p < 0.05$ )

694

695

696

697

698

699

700

701

702

703

704

705

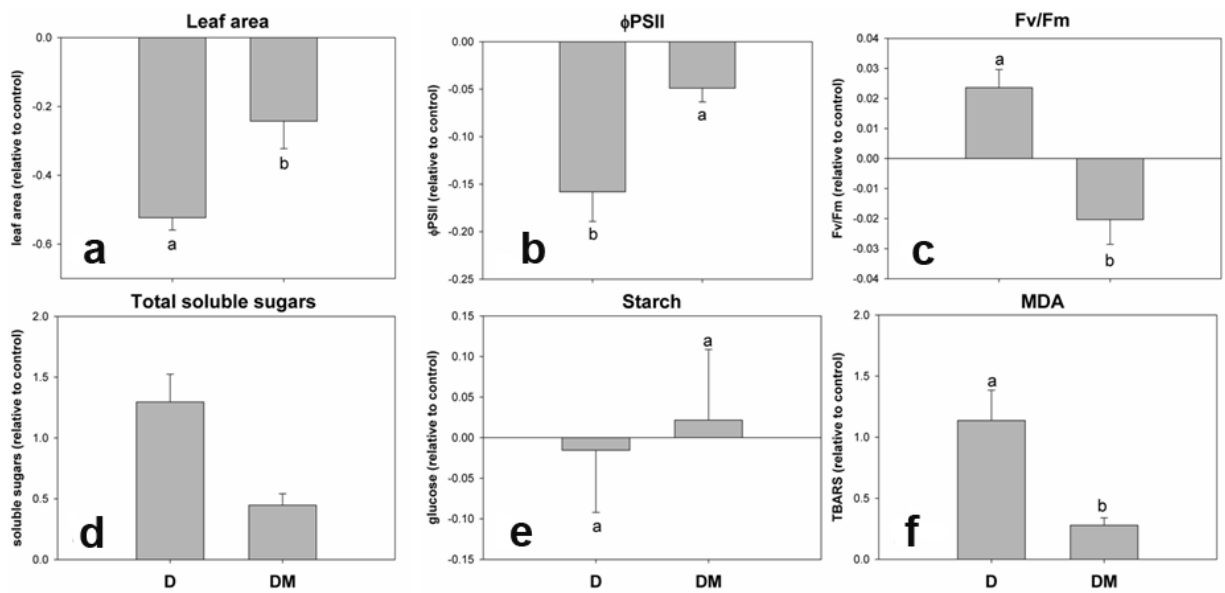

706 **Fig. 7.** Physiological alterations induced by SMV in soybean plants of two susceptible cultivars  
707 after the appearance of mosaic symptoms. **a.** Leaf area; **b.**  $\Phi$ PSII; **c.** Fv / FM; **d.** Total soluble  
708 sugars; **e.** Starch; **f.** MDA. Sampling was conducted 12 days after inoculation on the first  
709 trifoliolate leaf. Results are expressed as  $\pm$  SE of three independent experiments with at least three  
710 biological replicates each. Different letters indicate significant differences between treatments  
711 (DGC test.  $p < 0.05$ )

712

713

714

715

716

717

718

719

720

721

722

723

724

725

726

727

728

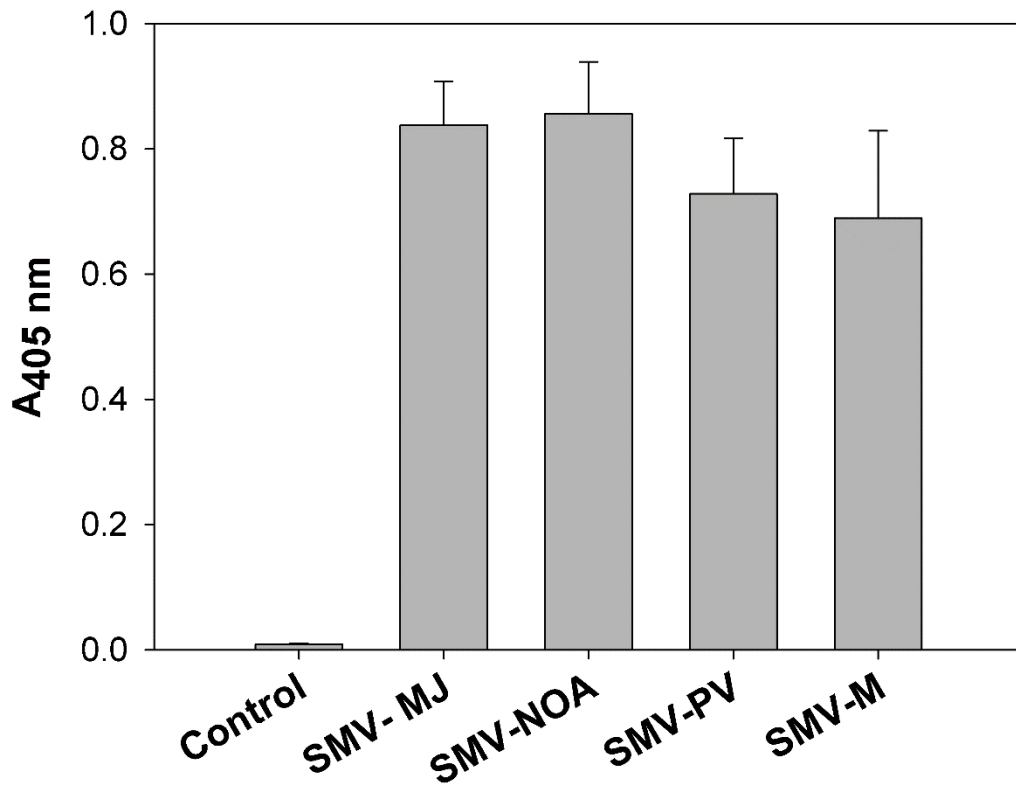

729 **Supplementary Figure 1.** SMV accumulation (expressed as A 405 values of ELISA reactions)

730 measured in the first trifoliolate leaf at 12 days after inoculation (25µg of total protein. well<sup>-1</sup>).

731 Results are expressed as mean ± SE of three independent experiments with at least three

732 biological replicates each.
